# Supplementary material for: Coordination polymers based on 1,1′-cobaltocenium dicarboxylate linkers
Source: Royal Society of Chemistry journal article supplement (doi:10.1039/c3ce41371c), 2013-01-01
Supplement: c3ce41371c.pdf [file c3ce41371c.pdf]

**Table SI 1.** Comparison of the atomic coordinates of  ${}^2_{\infty}[\text{Zn}(\text{ccdc})_2] \cdot 4 \text{H}_2\text{O}$  ( $I 4_1/a$ ) with the coordinates of  ${}^2_{\infty}[\text{Zn}(\text{ccdc})_2] \cdot 0.75 \text{H}_2\text{O}$  ( $I 112/b$ , right column). In the left column the coordinates are given together with a set of symmetry equivalent coordinates.

| ${}^2_{\infty}[\text{Zn}(\text{ccdc})_2] \cdot 4 \text{H}_2\text{O}$<br>$I 4_1/a$ |           |           |             | ${}^2_{\infty}[\text{Zn}(\text{ccdc})_2] \cdot 0.75 \text{H}_2\text{O}$<br>$I 112/b$ <sup>#</sup> |            |           |            |
|-----------------------------------------------------------------------------------|-----------|-----------|-------------|---------------------------------------------------------------------------------------------------|------------|-----------|------------|
|                                                                                   | x         | y         | z           |                                                                                                   | x          | y         | z          |
| <b>Co1</b>                                                                        | 1/2       | 3/4       | 0.44006(2)  | <b>Co1</b>                                                                                        | 1/2        | 3/4       | 0.44006(4) |
| <b>C1</b>                                                                         | 0.6343(2) | 0.6169(2) | 0.41722(9)  | <b>C1</b>                                                                                         | 0.6346(6)  | 0.6269(6) | 0.4176(2)  |
| <b>C2</b>                                                                         | 0.6368(3) | 0.6317(3) | 0.47129(9)  | <b>C2</b>                                                                                         | 0.6366(7)  | 0.6421(6) | 0.4716(2)  |
| <b>C3</b>                                                                         | 0.6667(3) | 0.7634(3) | 0.48235(10) | <b>C3</b>                                                                                         | 0.6653(7)  | 0.7772(6) | 0.4832(2)  |
| <b>C4</b>                                                                         | 0.6815(3) | 0.8308(3) | 0.43559(10) | <b>C4</b>                                                                                         | 0.6785(5)  | 0.8462(5) | 0.4355(2)  |
| <b>C5</b>                                                                         | 0.6624(3) | 0.7418(2) | 0.39579(10) | <b>C5</b>                                                                                         | 0.6631(5)  | 0.7536(5) | 0.3956(2)  |
| <b>C6</b>                                                                         | 0.5973(2) | 0.4967(2) | 0.38834(9)  | <b>C6</b>                                                                                         | 0.6026(6)  | 0.5028(6) | 0.3886(2)  |
| <b>O1</b>                                                                         | 0.6060(2) | 0.4979(2) | 0.34150(7)  | <b>O1</b>                                                                                         | 0.6201(5)  | 0.5032(5) | 0.3417(2)  |
| <b>O2</b>                                                                         | 0.5600(2) | 0.4015(2) | 0.41527(6)  | <b>O2</b>                                                                                         | 0.5589(5)  | 0.4061(4) | 0.4156(2)  |
| <b>Zn1</b>                                                                        | 1/2       | 1/4       | 3/8         | <b>Zn1</b>                                                                                        | 1/2        | 1/4       | 0.37433(4) |
| <b>O3</b>                                                                         | 0.6291(4) | 0.7029(4) | 0.2664(1)   | <b>O5*</b>                                                                                        | 0.637(2)   | 0.714(2)  | 0.2664(9)  |
|                                                                                   |           |           |             | <b>O6*</b>                                                                                        | 0          | 3/4       | 0.511(2)   |
| Symmetry equivalent positions<br>$3/4-y, x-1/4, 3/4-z$                            |           |           |             |                                                                                                   |            |           |            |
| <b>Co1'</b>                                                                       | 0         | 1/4       | 0.30994     | <b>Co2</b>                                                                                        | 0          | 1/4       | 0.30991(4) |
| <b>C1'</b>                                                                        | 0.1331    | 0.3843    | 0.33278     | <b>C7</b>                                                                                         | 0.1456(6)  | 0.3810(6) | 0.3319(2)  |
| <b>C2'</b>                                                                        | 0.1183    | 0.3868    | 0.27871     | <b>C8</b>                                                                                         | 0.1285(7)  | 0.3866(6) | 0.2777(2)  |
| <b>C3'</b>                                                                        | -0.0134   | 0.4167    | 0.26765     | <b>C9</b>                                                                                         | -0.0020(7) | 0.4196(6) | 0.2679(2)  |
| <b>C4'</b>                                                                        | -0.0808   | 0.4315    | 0.31441     | <b>C10</b>                                                                                        | -0.0634(7) | 0.4336(6) | 0.3153(2)  |
| <b>C5'</b>                                                                        | 0.0082    | 0.4124    | 0.35421     | <b>C11</b>                                                                                        | 0.0237(7)  | 0.4106(7) | 0.3552(2)  |
| <b>C6'</b>                                                                        | 0.2533    | 0.3473    | 0.36166     | <b>C12</b>                                                                                        | 0.2610(6)  | 0.3404(6) | 0.3604(2)  |
| <b>O1'</b>                                                                        | 0.2521    | 0.3560    | 0.40850     | <b>O3</b>                                                                                         | 0.2574(5)  | 0.3386(5) | 0.4075(2)  |
| <b>O2'</b>                                                                        | 0.3485    | 0.3100    | 0.33473     | <b>O4</b>                                                                                         | 0.3545(4)  | 0.3077(4) | 0.3324(2)  |

<sup>#</sup> non-conventional setting of space group  $C 2/c$  (unique axis  $c$ , cell choice 3 according to International Tables)

\* oxygen atoms of solvent water molecules with reduced occupation factor: O5 0.25; O6 0.125

**Table SI 2.** Comparison of the atomic coordinates of  ${}^2_{\infty}[\text{Zn}(\text{ccdc})_2] \cdot 4 \text{H}_2\text{O}$  ( $I 4_1/a$ ) with the coordinates of  ${}^2_{\infty}[\text{Cu}(\text{ccdc})_2] \cdot 1.5 \text{MeOH}$  ( $P 4_1$ ). In the second column a coordinate shift (+1/4, 0, 0) is applied and three sets of symmetry equivalent coordinates are generated, that correspond to the coordinates in  ${}^2_{\infty}[\text{Cu}(\text{ccdc})_2] \cdot 1.5 \text{MeOH}$  (right column).

|                                                     | ${}^2_{\infty}[\text{Zn}(\text{ccdc})_2] \cdot 4 \text{H}_2\text{O}$<br>$I 4_1/a$ |             |             | Coordinate shift<br>(+0.25, 0, 0) |                    |                    | ${}^2_{\infty}[\text{Cu}(\text{ccdc})_2] \cdot 1.5 \text{MeOH}$<br>$P 4_1$ |            |            |            |
|-----------------------------------------------------|-----------------------------------------------------------------------------------|-------------|-------------|-----------------------------------|--------------------|--------------------|----------------------------------------------------------------------------|------------|------------|------------|
|                                                     | x                                                                                 | y           | z           | $x_{\text{trans}}$                | $y_{\text{trans}}$ | $z_{\text{trans}}$ | x                                                                          | y          | z          |            |
| <b>C1</b>                                           | 0.6343(2)                                                                         | 0.6169(2)   | 0.41722(9)  | 0.8843(2)                         | 0.6169(2)          | 0.41722(9)         | <b>C1</b>                                                                  | 0.9071(6)  | 0.6732(6)  | 0.4974(3)  |
| <b>C2</b>                                           | 0.6368(3)                                                                         | 0.6317(3)   | 0.47129(9)  | 0.8868(3)                         | 0.6317(3)          | 0.47129(9)         | <b>C5</b>                                                                  | 0.8732(6)  | 0.6998(6)  | 0.5576(3)  |
| <b>C3</b>                                           | 0.6667(3)                                                                         | 0.7634(3)   | 0.48235(10) | 0.9167(3)                         | 0.7634(3)          | 0.48235(10)        | <b>C4</b>                                                                  | 0.8959(6)  | 0.8308(6)  | 0.5675(3)  |
| <b>C4</b>                                           | 0.6815(3)                                                                         | 0.8308(3)   | 0.43559(10) | 0.9315(3)                         | 0.8308(3)          | 0.43559(10)        | <b>C3</b>                                                                  | 0.9444(6)  | 0.8857(6)  | 0.5150(3)  |
| <b>C5</b>                                           | 0.6624(3)                                                                         | 0.7418(2)   | 0.39579(10) | 0.9124(3)                         | 0.7418(2)          | 0.39579(10)        | <b>C2</b>                                                                  | 0.9510(6)  | 0.7888(6)  | 0.4710(3)  |
| <b>C6</b>                                           | 0.5973(2)                                                                         | 0.4967(2)   | 0.38834(9)  | 0.8473(2)                         | 0.4967(2)          | 0.38834(9)         | <b>C6</b>                                                                  | 0.8823(6)  | 0.5495(6)  | 0.4665(3)  |
| <b>Co1</b>                                          | 0.5                                                                               | 0.75        | 0.44006(2)  | 0.75                              | 0.75               | 0.44006(2)         | <b>Co1</b>                                                                 | 0.76942(8) | 0.80699(8) | 0.50022(3) |
| <b>O1</b>                                           | 0.6060(2)                                                                         | 0.49792(18) | 0.34150(7)  | 0.8560(2)                         | 0.4979(2)          | 0.34150(7)         | <b>O2</b>                                                                  | 0.8974(5)  | 0.5445(4)  | 0.4121(2)  |
| <b>O2</b>                                           | 0.5600(2)                                                                         | 0.40150(16) | 0.41527(6)  | 0.8100(2)                         | 0.4015(2)          | 0.41527(6)         | <b>O1</b>                                                                  | 0.8466(4)  | 0.4612(4)  | 0.5000(2)  |
| <b>Zn1</b>                                          | 0.5                                                                               | 0.25        | 0.375       | 0.75                              | 0.25               | 0.375              | <b>Cu1</b>                                                                 | 0.77543(7) | 0.30990(7) | 0.46486(4) |
| Symmetry equivalent positions<br>1.5-x, 1.5-y, z    |                                                                                   |             |             |                                   |                    |                    |                                                                            |            |            |            |
| <b>C1'</b>                                          |                                                                                   |             |             | 0.6157(2)                         | 0.8830(2)          | 0.41722(9)         | <b>C7</b>                                                                  | 0.6427(6)  | 0.9471(6)  | 0.4848(3)  |
| <b>C2'</b>                                          |                                                                                   |             |             | 0.6132(3)                         | 0.8683(3)          | 0.47129(9)         | <b>C11</b>                                                                 | 0.6592(7)  | 0.8727(6)  | 0.4322(3)  |
| <b>C3'</b>                                          |                                                                                   |             |             | 0.5833(3)                         | 0.7366(3)          | 0.4824(1)          | <b>C10</b>                                                                 | 0.6244(7)  | 0.7449(7)  | 0.4471(3)  |
| <b>C4'</b>                                          |                                                                                   |             |             | 0.5685(3)                         | 0.6692(3)          | 0.4356(1)          | <b>C9</b>                                                                  | 0.5862(7)  | 0.7417(7)  | 0.5075(3)  |
| <b>C5'</b>                                          |                                                                                   |             |             | 0.5876(3)                         | 0.7582(2)          | 0.3958(1)          | <b>C8</b>                                                                  | 0.5982(6)  | 0.8664(7)  | 0.5314(3)  |
| <b>C6'</b>                                          |                                                                                   |             |             | 0.6527(2)                         | 1.0033(2)          | 0.38834(9)         | <b>C12</b>                                                                 | 0.6767(6)  | 1.0862(6)  | 0.4910(3)  |
| <b>O1'</b>                                          |                                                                                   |             |             | 0.6440(2)                         | 1.0021(2)          | 0.34150(7)         | <b>O3</b>                                                                  | 0.6671(6)  | 1.1329(5)  | 0.5407(2)  |
| <b>O2'</b>                                          |                                                                                   |             |             | 0.6900(2)                         | 1.0985(2)          | 0.41527(6)         | <b>O4</b>                                                                  | 0.7083(4)  | 1.1417(4)  | 0.4443(2)  |
| Symmetry equivalent positions<br>y-0.5, 1-x, 0.75-z |                                                                                   |             |             |                                   |                    |                    |                                                                            |            |            |            |
| <b>C1''</b>                                         |                                                                                   |             |             | 0.1169(2)                         | 0.1157(2)          | 0.33278(9)         | <b>C13</b>                                                                 | 0.1507(6)  | 0.1877(6)  | 0.4593(3)  |
| <b>C2''</b>                                         |                                                                                   |             |             | 0.1317(3)                         | 0.1132(3)          | 0.27871(9)         | <b>C14</b>                                                                 | 0.1863(6)  | 0.1769(6)  | 0.3993(3)  |
| <b>C3''</b>                                         |                                                                                   |             |             | 0.2634(3)                         | 0.0833(3)          | 0.2677(1)          | <b>C15</b>                                                                 | 0.3201(6)  | 0.1568(7)  | 0.3970(4)  |
| <b>C4''</b>                                         |                                                                                   |             |             | 0.3308(3)                         | 0.0685(3)          | 0.3144(1)          | <b>C16</b>                                                                 | 0.3672(6)  | 0.1555(7)  | 0.4557(4)  |
| <b>C5''</b>                                         |                                                                                   |             |             | 0.2418(2)                         | 0.0876(3)          | 0.3542(1)          | <b>C17</b>                                                                 | 0.2636(6)  | 0.1767(7)  | 0.4938(3)  |
| <b>C6''</b>                                         |                                                                                   |             |             | -0.0033(2)                        | 0.1527(2)          | 0.36166(9)         | <b>C18</b>                                                                 | 0.0212(6)  | 0.2173(6)  | 0.4809(3)  |
| <b>Co1''</b>                                        |                                                                                   |             |             | 0.25                              | 0.25               | 0.30994(2)         | <b>Co2</b>                                                                 | 0.28048(8) | 0.32407(9) | 0.43726(3) |
| <b>O1''</b>                                         |                                                                                   |             |             | -0.0021(2)                        | 0.1440(2)          | 0.40850(7)         | <b>O5</b>                                                                  | -0.0026(4) | 0.2102(5)  | 0.5345(2)  |
| <b>O2''</b>                                         |                                                                                   |             |             | -0.0985(2)                        | 0.1900(2)          | 0.33473(6)         | <b>O6</b>                                                                  | -0.0583(4) | 0.2479(5)  | 0.4414(2)  |
| Symmetry equivalent positions<br>1-y, x-0.5, 0.75-z |                                                                                   |             |             |                                   |                    |                    |                                                                            |            |            |            |
| <b>C1'''</b>                                        |                                                                                   |             |             | 0.3831(2)                         | 0.3843(2)          | 0.33278(9)         | <b>C19</b>                                                                 | 0.4209(6)  | 0.4540(6)  | 0.4283(3)  |
| <b>C2'''</b>                                        |                                                                                   |             |             | 0.3683(3)                         | 0.3868(3)          | 0.27871(9)         | <b>C23</b>                                                                 | 0.3498(6)  | 0.4754(7)  | 0.4819(3)  |
| <b>C3'''</b>                                        |                                                                                   |             |             | 0.2366(3)                         | 0.4167(3)          | 0.2677(1)          | <b>C22</b>                                                                 | 0.2192(6)  | 0.4985(6)  | 0.4654(3)  |
| <b>C4'''</b>                                        |                                                                                   |             |             | 0.1692(3)                         | 0.4315(3)          | 0.3144(1)          | <b>C21</b>                                                                 | 0.2101(7)  | 0.4871(6)  | 0.4018(3)  |
| <b>C5'''</b>                                        |                                                                                   |             |             | 0.2582(2)                         | 0.4124(3)          | 0.3542(1)          | <b>C20</b>                                                                 | 0.3347(7)  | 0.4603(6)  | 0.3800(3)  |
| <b>C6'''</b>                                        |                                                                                   |             |             | 0.5033(2)                         | 0.3473(2)          | 0.36166(9)         | <b>C24</b>                                                                 | 0.5569(6)  | 0.4131(6)  | 0.4258(3)  |
| <b>O1'''</b>                                        |                                                                                   |             |             | 0.5021(2)                         | 0.3560(2)          | 0.40850(7)         | <b>O7</b>                                                                  | 0.6056(4)  | 0.3834(4)  | 0.4743(2)  |
| <b>O2'''</b>                                        |                                                                                   |             |             | 0.5985(2)                         | 0.3400(2)          | 0.33473(6)         | <b>O8</b>                                                                  | 0.6088(5)  | 0.4107(7)  | 0.3780(2)  |

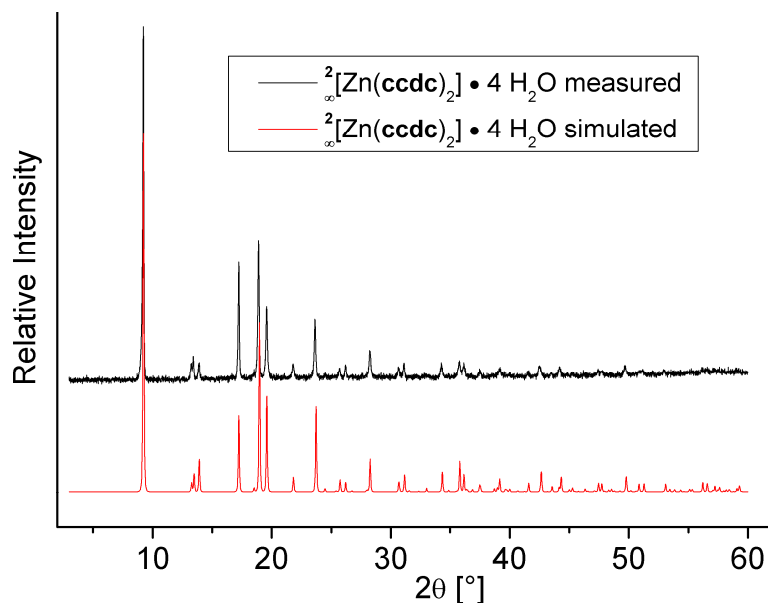

**Figure SI 1.** X-Ray powder diffraction patterns of  ${}^2_{\infty}[\text{Zn}(\text{ccdc})_2] \cdot 4 \text{H}_2\text{O}$  ( $2 \cdot 4 \text{H}_2\text{O}$ ) at room temperature ( $\lambda(\text{Cu-K}\alpha_1) = 154.0598 \text{ pm}$ ): red - simulated from single crystal data; black - as synthesized material, measured.

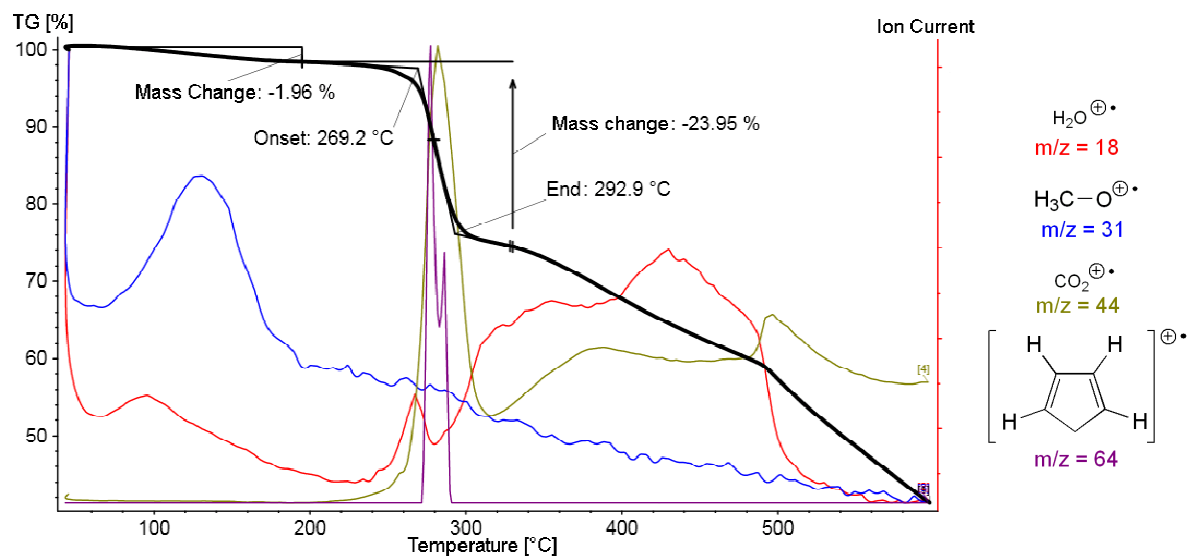

**Figure SI 2.** TG curve (black) of  ${}^2_{\infty}[\text{Zn}(\text{ccdc})_2] \cdot 4 \text{H}_2\text{O}$  ( $2 \cdot 4 \text{H}_2\text{O}$ ) incl. mass loss steps, onset and offset temperatures and selected  $m/z$ -signals from the online TG-MS-coupling (each  $m/z$  signal is scaled individually for better visibility; molecule fragments corresponding to  $m/z$  depicted right); heating rate 10 K/min, helium atmosphere.

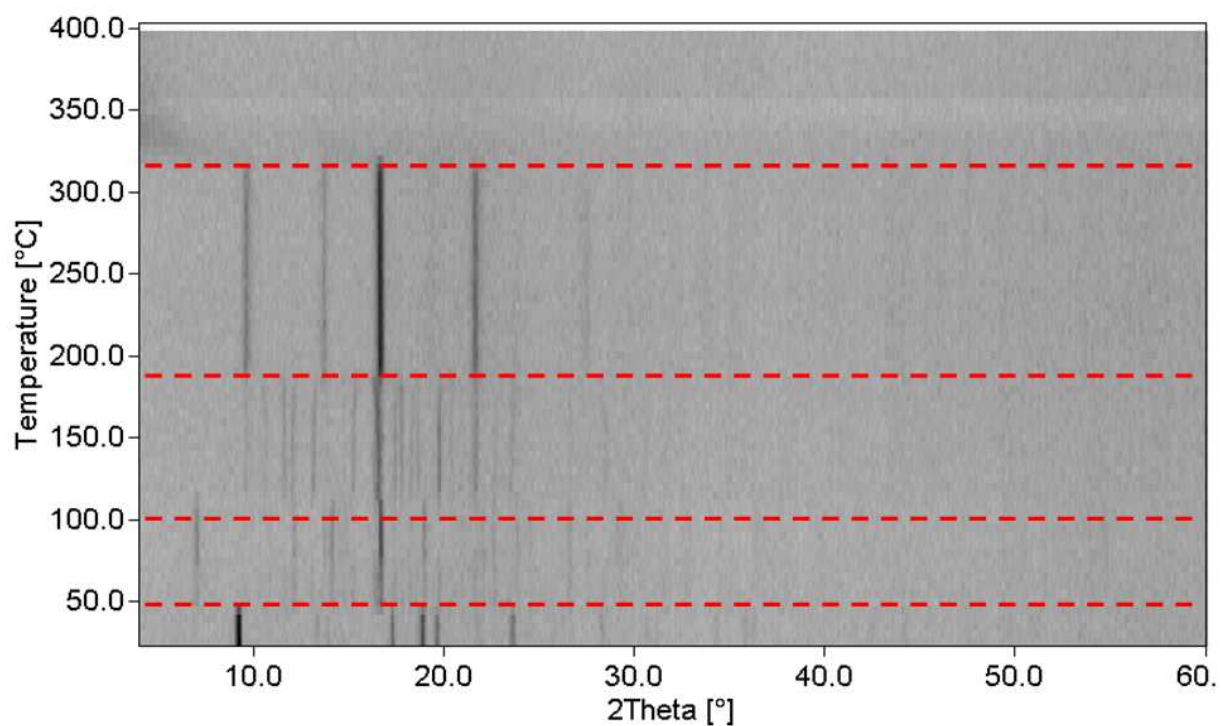

**Figure SI 3.** Temperature dependent X-Ray powder diffraction pattern of  ${}^2_{\infty}[\text{Zn}(\text{ccdc})_2] \cdot 4 \text{H}_2\text{O}$  (2 · 4 H<sub>2</sub>O) from room temperature to 400 °C; Cu-K<sub>α1</sub> radiation ( $\lambda = 154.0598 \text{ pm}$ ).

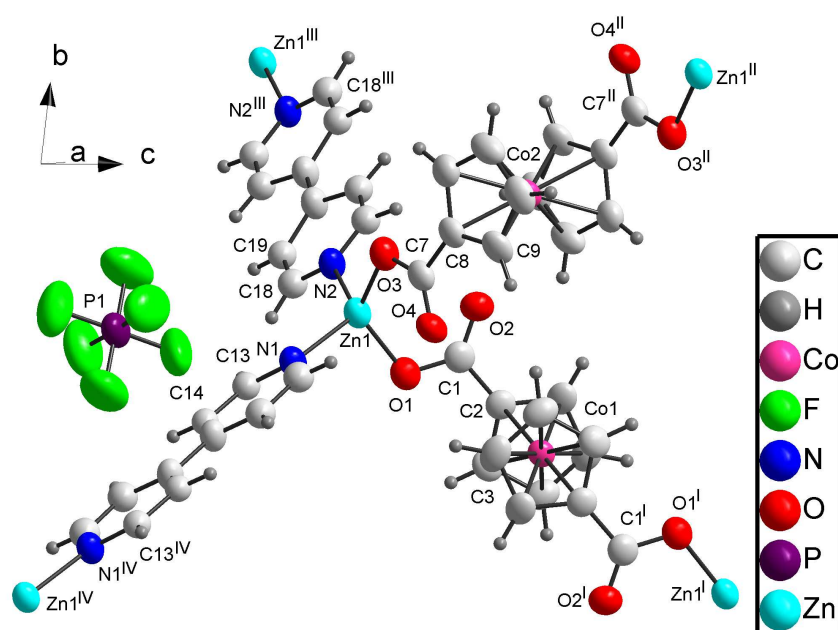

**Figure SI 4** Fragment of the crystal structure of  ${}^3_{\infty}[\text{Zn}(\text{ccdc})(\text{bipy})]\text{PF}_6$  (**4**, 50 % ellipsoids, rotational disorder in pyridyl groups not shown)

Symmetry operations I:  $1-x, -y, 2-z$ ; II:  $-x, 1-y, 2-z$ ; III:  $2-x, 1-y, 1-z$ ; IV:  $-x, -y, 1-z$

Selected bond lengths and angles:

Zn1-O1 195.5(4); Zn1-O3; 196.0(4); Zn1-N1 208.2(5); Zn1-N2 208.0(4); C1-O1 131.8(6); C1-O2 123.5(7); C7-O3 129.3(6); C7-O4 123.3(6) pm;  
 O1-Zn1-O3 125.8(2); O1-Zn1-N1 101.4(2); O1-Zn1-N2 102.6(2); N1-Zn1-N2 116.7(2);  
 O3-Zn1-N1 108.2(2); O3-Zn1-N2 102.9(2) °

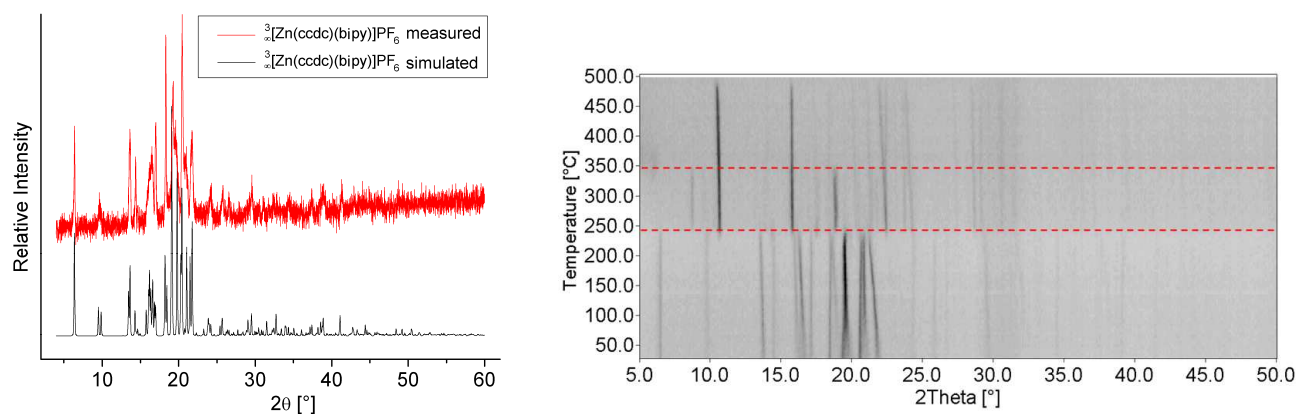

**Figure SI 5.** X-Ray powder diffraction pattern of  ${}^3_{\infty}[\text{Zn}(\text{ccdc})(\text{bipy})]\text{PF}_6$  (**4**); left: Simulation based on single crystal data (black) and measured diffraction pattern (red); right: Temperature dependent diffraction pattern of **4**;  $\lambda(\text{Cu-K}\alpha_1) = 154.0598$  pm.

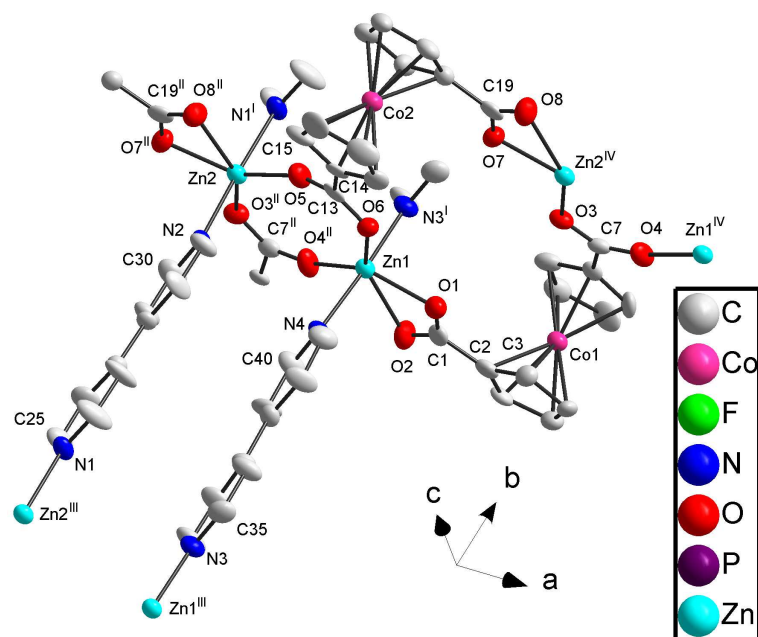

**Figure SI 6.** Fragment of the crystal structure of  $2_{\infty}[\text{Zn}(\text{ccdc})(\text{bipy})]\text{PF}_6$  (**5**, 50 % ellipsoids); Symmetry operations I:  $x, 1+y, z$ ; II:  $-0,5+x, 1,5-y, z$ ; III:  $x, -1+y, z$ ; IV:  $0,5+x, 1,5-y, z$

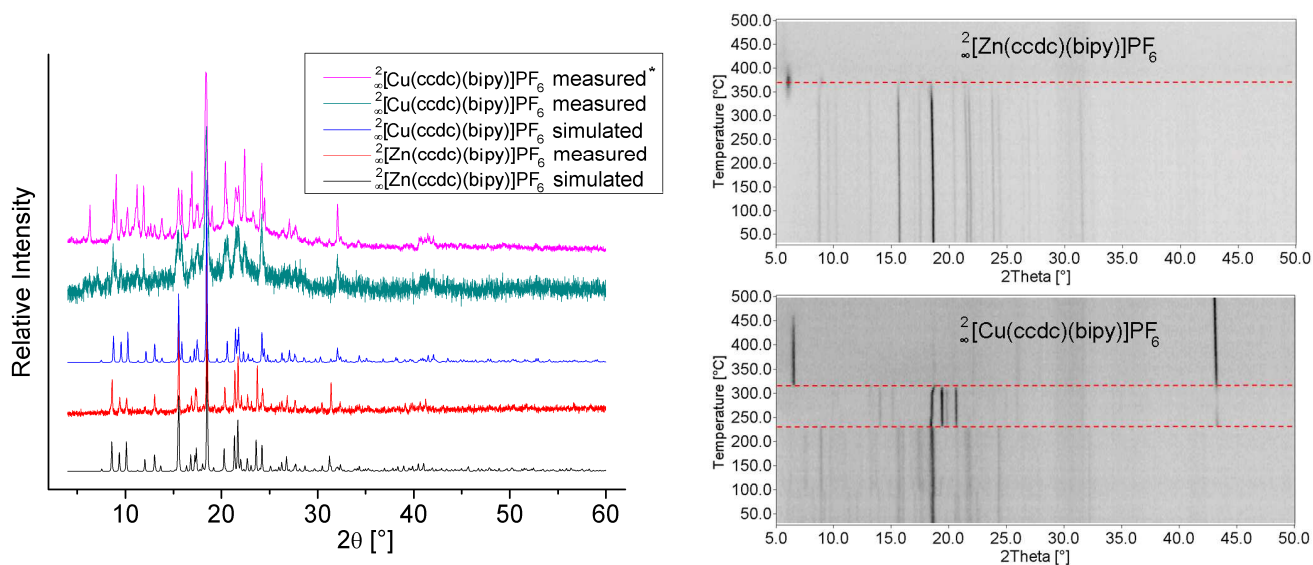

**Figure SI 7.** X-Ray powder diffraction pattern of  $2_{\infty}[\text{Zn}(\text{ccdc})(\text{bipy})]\text{PF}_6$  (**5**) and  $2_{\infty}[\text{Cu}(\text{ccdc})(\text{bipy})]\text{PF}_6$  (**6**)  
 left: Simulation based on single crystal data (black for **5** and blue for **6**) and measured diffraction patterns (red for **5**); the pink diffraction pattern (\*) belongs to a sample of **6** synthesized in presence of additional  $\text{KPF}_6$ .  
 right: Temperature dependent diffraction patterns of **5** and **6**;  $\lambda(\text{Cu-K}\alpha_1) = 154.0598$  pm.
